# Supplementary material for: Platinum-complexed phosphorous-doped carbon nitride for electrocatalytic hydrogen evolution
Source: Royal Society of Chemistry journal article supplement (doi:10.1039/d1ta06240a), 2021-09-21
Supplement: d1ta06240a1.pdf [file d1ta06240a1.pdf]

Electronic Supplementary Information

**Platinum-complexed phosphorous-doped carbon nitride for electrocatalytic hydrogen evolution**

Forrest Nichols,<sup>a</sup> Qiming Liu,<sup>a</sup> Jasleen Sandhu,<sup>a</sup> Zahra Azhar,<sup>a</sup> Rafael Cazares,<sup>a</sup> Rene Mercado,<sup>a</sup> Frank Bridges,<sup>b</sup> Shaowei Chen<sup>\*,a</sup>

<sup>a</sup> Department of Chemistry and Biochemistry, University of California, 1156 High Street, Santa Cruz, California 95064, United States

<sup>b</sup> Department of Physics, University of California, 1156 High Street, Santa Cruz, California 95064, United States

\* E-mail: [shaowei@ucsc.edu](mailto:shaowei@ucsc.edu)

**List of Contents**

- Six figures
- Three tables

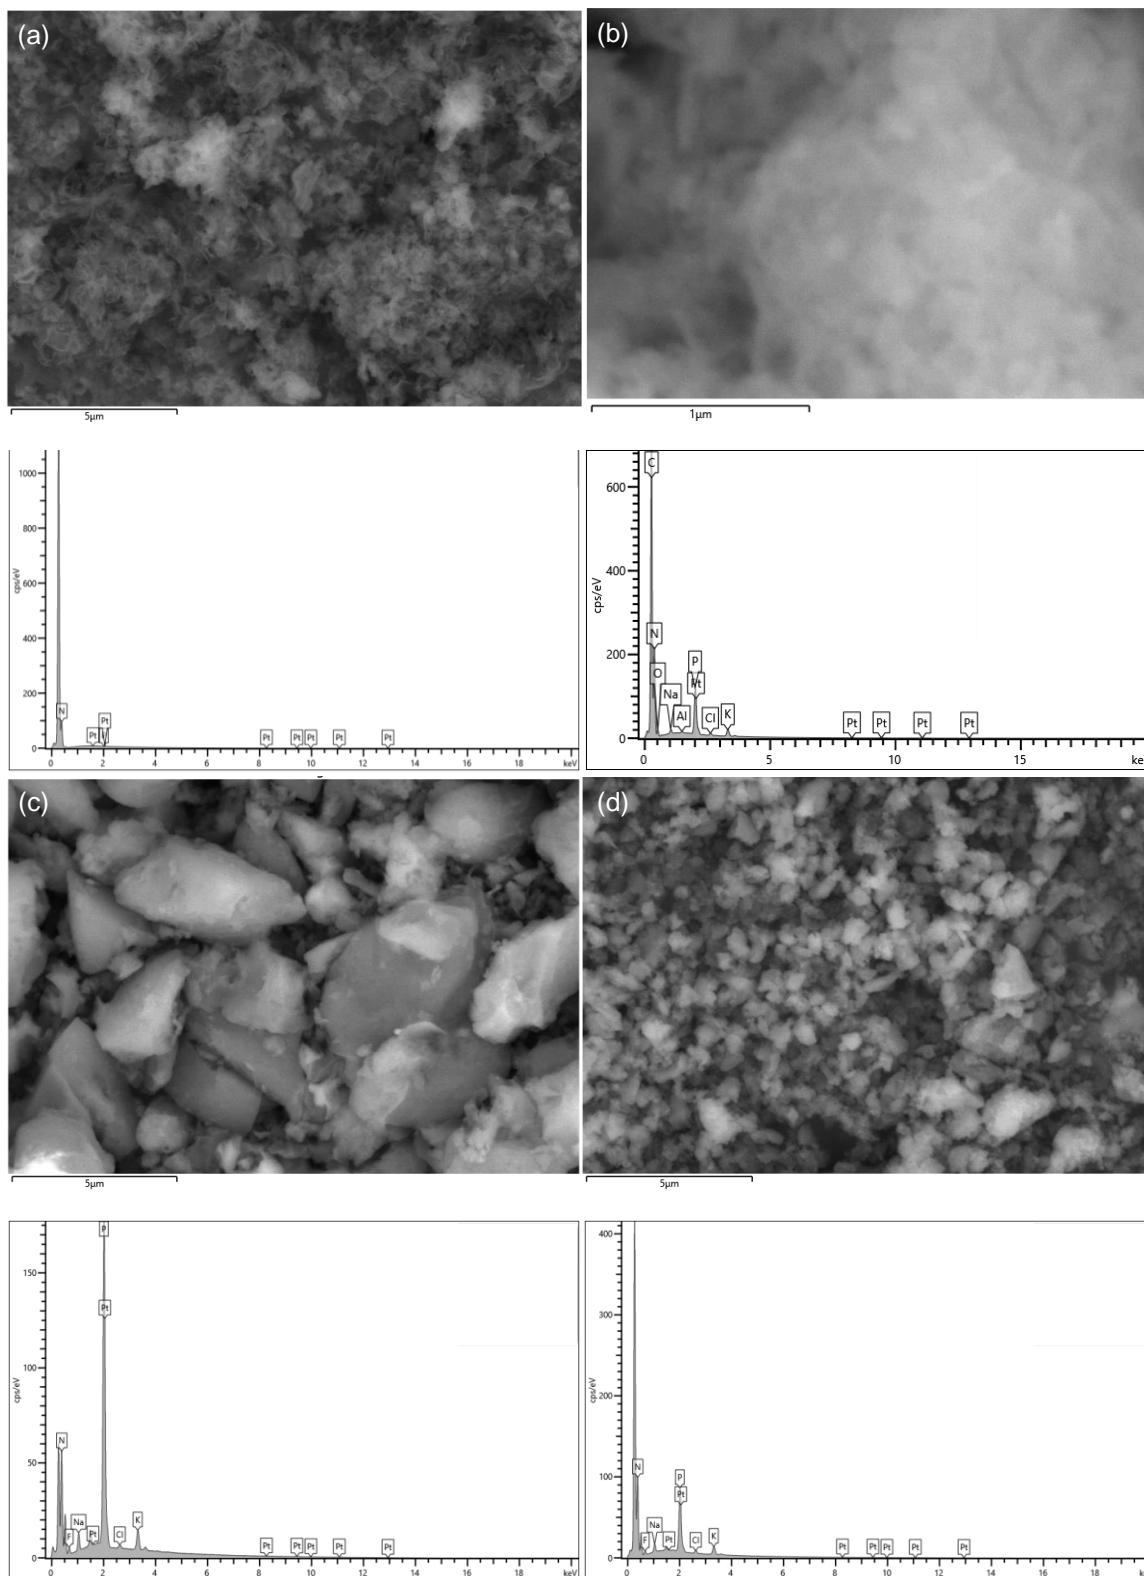

**Figure S1.** SEM images of (a) PtCNP<sub>1</sub>, (b) PtCNP<sub>2</sub>, (c) PtCNP<sub>3</sub>, and (d) PtCNP<sub>4</sub>. The corresponding EDS spectra are included below the respective panel, where Pt signals can be readily identified in all samples.

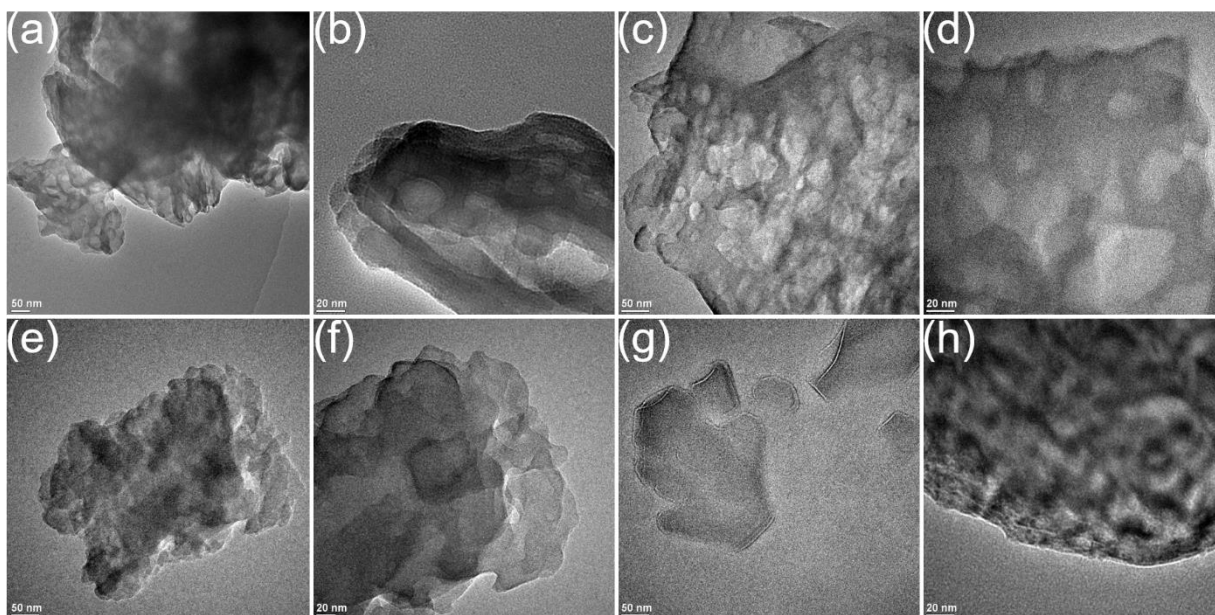

**Figure S2.** TEM images of (a, b) PtCN, (c, d) PtCNP<sub>1</sub>, (e, f) PtCNP<sub>3</sub>, (g, h) PtCNP<sub>4</sub>. Scale bars are (a, c, e, g) 50 nm and (b, d, f, h) 20 nm.

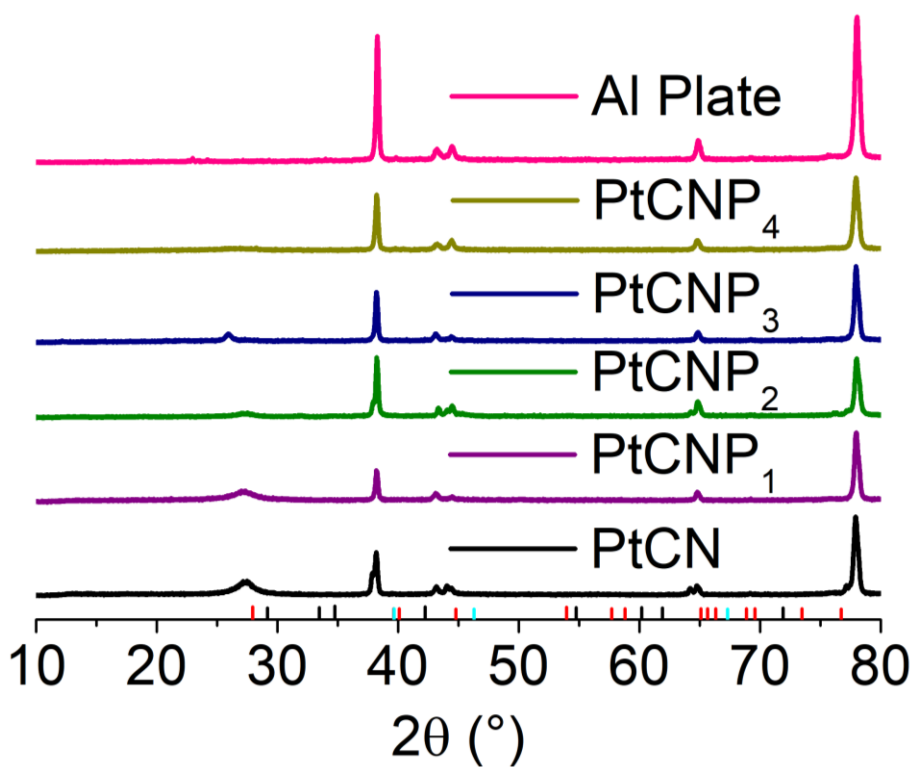

**Figure S3.** XRD patterns of the sample series deposited onto an aluminum plate. Reference lines are provided at the bottom of the plot and refer to cubic Pt with space group  $fm-3m$  (JCPDS: 00-001-1190) (cyan), tetragonal PtO with space group  $p42/mmc$  (JCPDS: 00-027-1331) (black), and orthorhombic PtO<sub>2</sub> with space group  $pnm$  (JCPDS: 00-023-1306) (red).

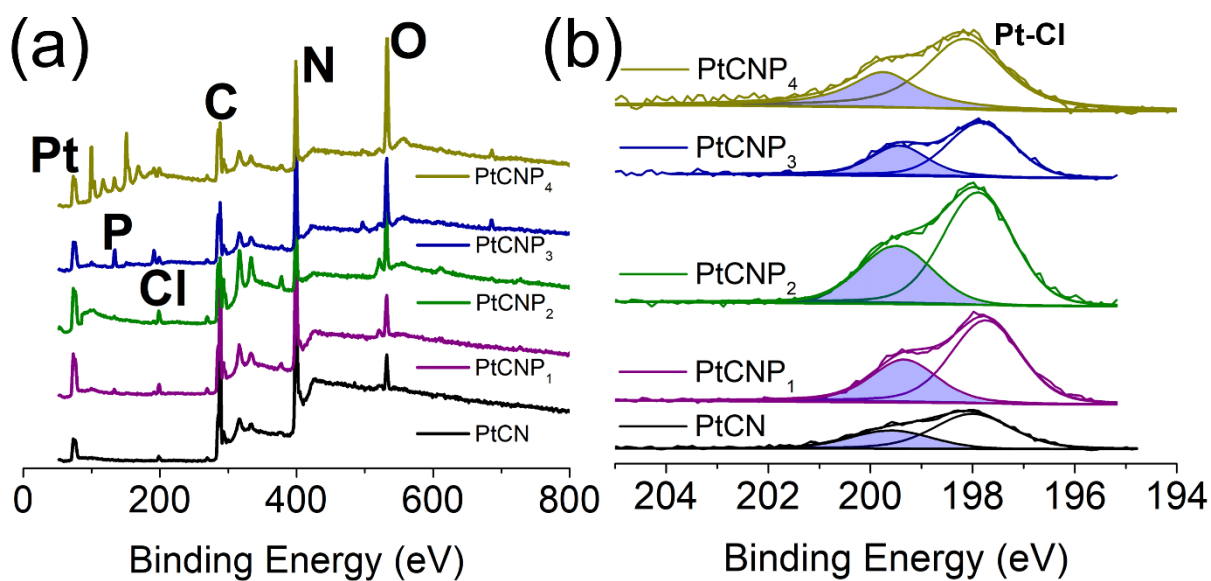

**Figure S4.** (a) XPS survey spectra of PtCN, PtCNP<sub>1</sub>, PtCNP<sub>2</sub>, PtCNP<sub>3</sub>, and PtCNP<sub>4</sub>. (b) High-resolution Cl 2p spectra of the sample series.

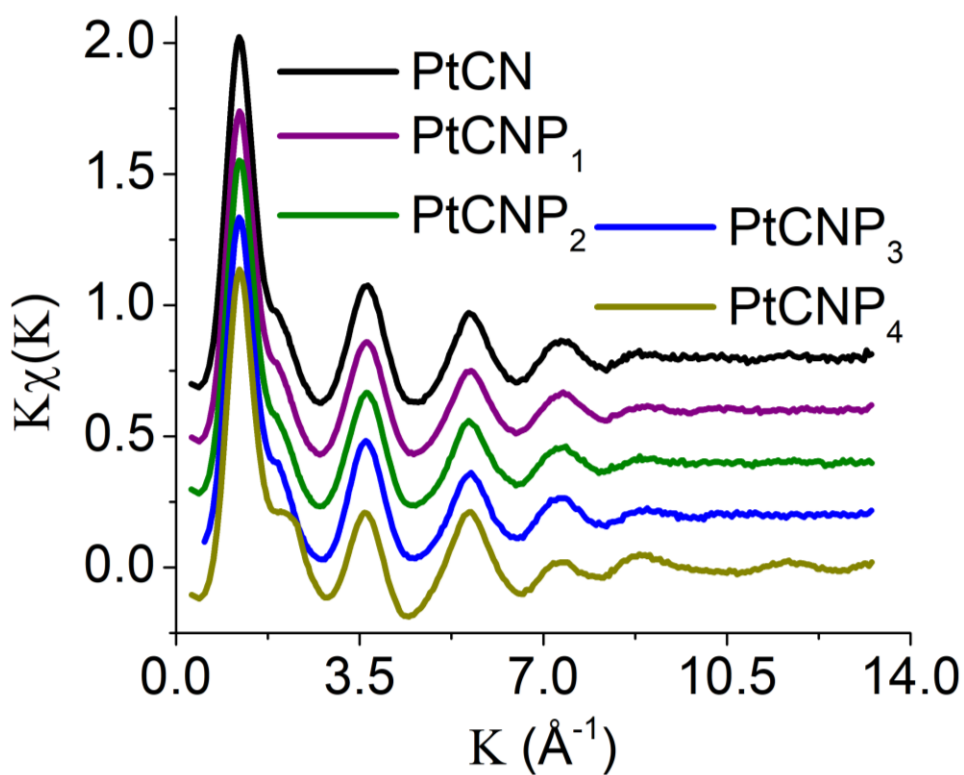

**Figure S5.** Pt L3 edge k-space data for the sample series collected at 10 K. Plots are produced by averaging 3 traces from for each sample.

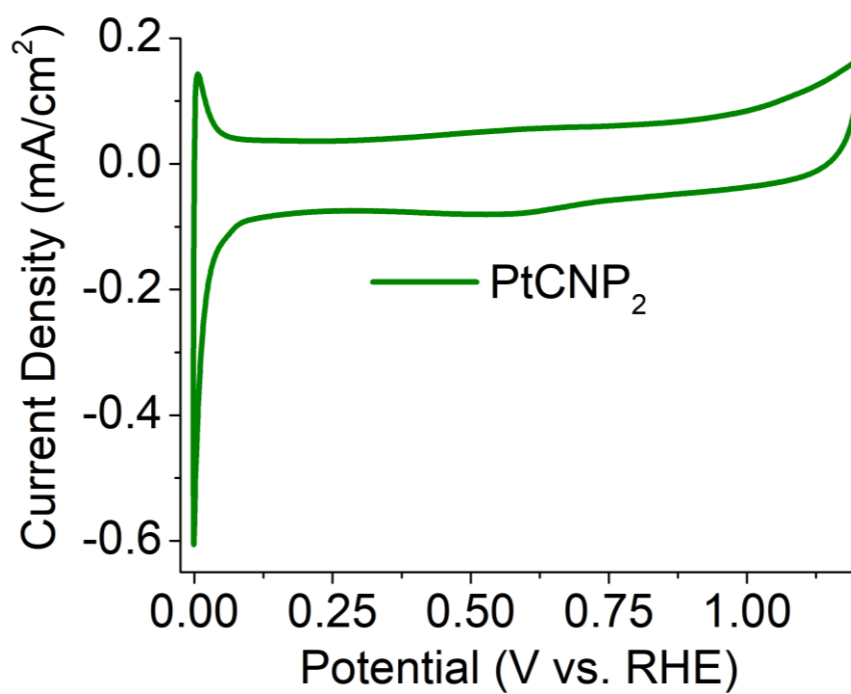

**Figure S6.** Cyclic voltammogram of the PtCNP<sub>2</sub> sample performed in N<sub>2</sub> saturated H<sub>2</sub>SO<sub>4</sub> at a scan rate of 10 mV s<sup>-1</sup>. Current density is obtained by normalizing the current to the electrode geometrical surface area.

**Table S1.** Elemental compositions (at%) of the sample series from XPS measurements

| Sample             | C     | N     | O     | P     | Cl   | Pt   |
|--------------------|-------|-------|-------|-------|------|------|
| PtCN               | 43.98 | 51.01 | 3.71  | 0.00  | 0.58 | 0.73 |
| PtCNP <sub>1</sub> | 43.66 | 45.35 | 6.38  | 1.31  | 1.60 | 1.69 |
| PtCNP <sub>2</sub> | 44.39 | 46.37 | 4.73  | 1.11  | 1.72 | 1.69 |
| PtCNP <sub>3</sub> | 39.63 | 38.11 | 13.19 | 6.32  | 1.17 | 1.58 |
| PtCNP <sub>4</sub> | 19.91 | 7.25  | 55.53 | 11.03 | 5.96 | 0.32 |

**Table S2.** Pt 4f binding energy and atomic ratio of the sample series

| Sample             | Pt(II)                 |                        | Pt(IV)                 |                        | Pt(II)/Pt(IV) ratio |
|--------------------|------------------------|------------------------|------------------------|------------------------|---------------------|
|                    | 4f <sub>7/2</sub> (eV) | 4f <sub>5/2</sub> (eV) | 4f <sub>7/2</sub> (eV) | 4f <sub>5/2</sub> (eV) |                     |
| PtCN               | 72.63                  | 75.98                  | 74.35                  | 77.70                  | 4.01                |
| PtCNP <sub>1</sub> | 72.40                  | 75.75                  | 74.02                  | 77.37                  | 5.12                |
| PtCNP <sub>2</sub> | 72.54                  | 75.89                  | 74.34                  | 77.69                  | 11.80               |
| PtCNP <sub>3</sub> | 72.49                  | 75.84                  | 74.29                  | 77.64                  | 4.70                |
| PtCNP <sub>4</sub> | 72.41                  | 75.76                  | 73.48                  | 76.83                  | 2.70                |

**Table S3.** Binding energy of the P and Cl 2p<sub>3/2</sub> electrons in the sample series

| Sample             | P                      |                        | Cl                     |                        |
|--------------------|------------------------|------------------------|------------------------|------------------------|
|                    | 2p <sub>3/2</sub> (eV) | 2p <sub>1/2</sub> (eV) | 2p <sub>3/2</sub> (eV) | 2p <sub>1/2</sub> (eV) |
| PtCN               | -                      |                        | 198.00                 | 199.6                  |
| PtCNP <sub>1</sub> | 133.39                 | 134.26                 | 197.74                 | 199.34                 |
| PtCNP <sub>2</sub> | 132.88                 | 133.75                 | 197.79                 | 199.39                 |
| PtCNP <sub>3</sub> | 133.12                 | 133.99                 | 197.83                 | 199.43                 |
| PtCNP <sub>4</sub> | 133.01                 | 133.88                 | 198.15                 | 199.75                 |
